# Supplementary material for: Arsenic in Portuguese Rice: Is There Any Risk?
Source: MDPI journal article supplement (doi:10.3390/foods11030277), 2022-01-20
Supplement: s1 [file s1]

**Supporting information for:**  
**Arsenic in Portuguese rice. Is there any risk?**

Alexandra A. Silva <sup>a</sup>, André M.P.T. Pereira <sup>a,\*</sup>, Liliana J.G. Silva <sup>a</sup>, Angelina Pena <sup>a</sup>

<sup>a</sup> *LAQV, REQUIMTE, Laboratory of Bromatology and Pharmacognosy, Faculty of Pharmacy,  
University of Coimbra, Polo III, Azinhaga de St<sup>a</sup> Comba, 3000-548 Coimbra, Portugal*

**\*Corresponding author:**

LAQV, REQUIMTE, Group of Bromatology, Pharmacognosy and Analytical Sciences, Faculty of Pharmacy, University of Coimbra

Pólo das Ciências da Saúde, Azinhaga de Santa Comba, 3000-548 Coimbra, Portugal.

Tel: +351239488400

Fax : +351239827126

**E-mail addresses:**

alexandra.silv@hotmail.com (A.A. Silva), amptpereira@gmail.com (A.M.P.T. Pereira),

ljgsilva@hotmail.com (L.J.G. Silva), apena@ci.uc.pt (A. Pena)

Figure S1. Preparation of white (A) and brown (B) rice samples.

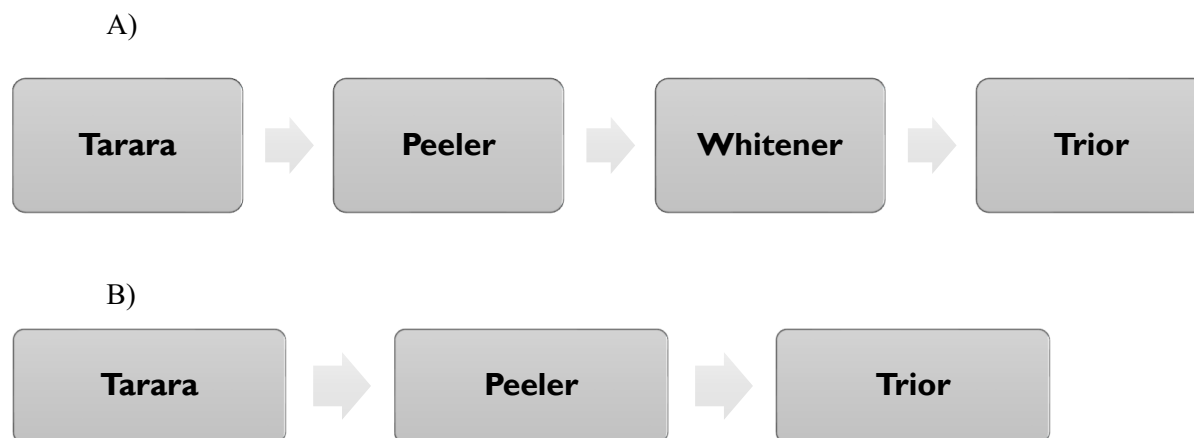

The tarara separates the rice from residues that it can bring, such as straw; peeler removes the husk from the rice; in the whitener the rice under goes a physical process of friction resulting in the removal of the aleurone layer; in the trior the whole rice is separated from the cracked one.

Table S1. Sample characterization.

[illegible]

|                                  |         |       |                    |
|----------------------------------|---------|-------|--------------------|
| <b>Short - Carolino</b>          | Tejo    | White | NA                 |
| <b>Short - Carolino</b>          | Tejo    | Bronw | NA                 |
| <b>Short - Carolino</b>          | Tejo    | White | NA                 |
| <b>Short - Carolino</b>          | Tejo    | Bronw | NA                 |
| <b>Short - Carolino</b>          | Tejo    | White | NA                 |
| <b>Short - Carolino</b>          | Tejo    | Bronw | NA                 |
| <b>Short - Carolino</b>          | Tejo    | White | NA                 |
| <b>Short - Carolino</b>          | Tejo    | Bronw | NA                 |
| <b>Short - Carolino</b>          | Sado    | White | NA                 |
| <b>Short - Carolino</b>          | Sado    | Bronw | NA                 |
| <b>Short - Carolino</b>          | NA      | White | Ceifeira           |
| <b>Short - Carolino</b>          | NA      | White | Golden Sun         |
| <b>Short - Sushi</b>             | NA      | White | Caçarola           |
| <b>Long - Agulha</b>             | Mondego | White | NA                 |
| <b>Long - Agulha</b>             | Mondego | Bronw | NA                 |
| <b>Long - Agulha</b>             | Mondego | White | NA                 |
| <b>Long - Agulha</b>             | Mondego | Bronw | NA                 |
| <b>Long - Agulha</b>             | NA      | White | Caçarola           |
| <b>Long - Agulha</b>             | NA      | White | Amanhecer          |
| <b>Long - Agulha</b>             | NA      | White | Por si             |
| <b>Long - Agulha</b>             | NA      | White | Pingo Doce         |
| <b>Long - Basmati</b>            | NA      | White | Por si             |
| <b>Long - Basmati</b>            | NA      | White | Caçarola           |
| <b>Long - Basmati</b>            | NA      | White | Pingo Doce         |
| <b>Long - Basmati</b>            | NA      | White | Oriente            |
| <b>Long - Basmati Brown rice</b> | NA      | Bronw | Continente Seleção |
| <b>Long - Jasmine</b>            | NA      | White | Auchan             |
| <b>Long - Jasmine</b>            | NA      | White | Pingo Doce         |
| <b>Long - Thai</b>               | NA      | White | Caçarola           |
| <b>Long - Thai Jasmine</b>       | NA      | White | Continente         |
| <b>Long - Punjab Aromatic</b>    | Punjab  | White | Continente Seleção |
| <b>Long - Steamed</b>            | NA      | Brown | Por si             |
| <b>Long - Black</b>              | NA      | Brown | Caçarola           |
| <b>Long - Wild</b>               | NA      | Bronw | Caçarola           |
| <b>Long - Brown rice</b>         | NA      | Bronw | Saludões           |

NA – Not available

Table S2. Arsenic detection settings, in the ICP-MS XSERIES-2, ThermoUnican equipment.

|                       |                      |              |
|-----------------------|----------------------|--------------|
| <b>Survey Setup</b>   | Sweeps               | 5            |
|                       | Dwell Time           | 600          |
|                       | Channels per mass    | 10           |
|                       | Acquisition Duration | 6623         |
| <b>Main Run Setup</b> | Main Run             | Peak Jumping |
|                       | Sweeps               | 200          |
|                       | Dwell Time           | 10000        |
|                       | Channels per mass    | 1            |
|                       | Acquisition Duration | 22287        |
|                       | Channel Spacing      | 0,02         |
| <b>Settings sets</b>  | Extraction           | -106,00      |
|                       | Lens 1               | -1170,00     |
|                       | Lens 2               | -79,20       |
|                       | Lens 3               | -185,90      |
|                       | Pole Bias            | -3,00        |
|                       | Sampling Depth       | 108,00       |
|                       | Nebuliser            | 0,87         |
|                       | Forward power        | 1370,00      |

Table S3. Validation results for the analytical methodology.

|                           | <b>Standard linearity<br/>(0.2 – 5.0 µg L<sup>-1</sup>)<br/>(<i>r</i><sup>2</sup>)</b> | <b>MDL</b>              | <b>MQL</b>             | <b>Recovery assays<br/>10.0 µg kg<sup>-1</sup><br/>(range)<br/>(n=5)</b> | <b>Precision</b> |
|---------------------------|----------------------------------------------------------------------------------------|-------------------------|------------------------|--------------------------------------------------------------------------|------------------|
| <b>Arsenic<br/>result</b> | 0.99997                                                                                | 3.3 µg kg <sup>-1</sup> | 10 µg kg <sup>-1</sup> | 89-114%                                                                  | 10.8%            |

MDL – Method detection limit; MQL – Method quantification limit
